# Supplementary material for: NiO nanowires as hole-transfer layer for drastic enhancement of CdSe-sensitized photocathodes
Source: Royal Society of Chemistry journal article supplement (doi:10.1039/c9nj00007k), 2019-01-01
Supplement: c9nj00007k1.pdf [file c9nj00007k1.pdf]

## Supplementary Information

### NiO nanowires as hole-transfer layer for drastic enhancement of CdSe-sensitized photocathodes

Shuang Zhao, Yuming Dong\*, Guangli Wang, Pingping Jiang, Yuxia Zhang, Hongyan

Miao and Xiuming Wu

International Joint Research Center for Photo-responsive Molecules and Materials,  
School of Chemical and Material Engineering, Jiangnan University, Wuxi 214122, P.  
R. China

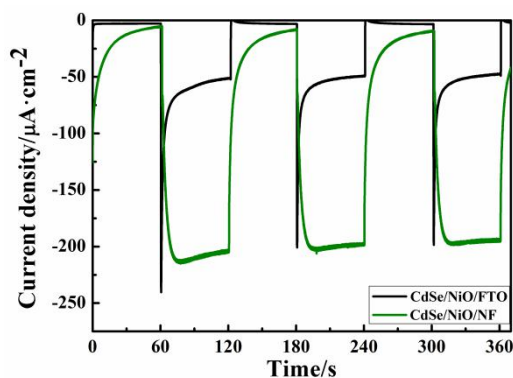

**Figure S1.** Photocurrent responses to on-off illumination of CdSe/NiO/FTO and CdSe/NiO/NF in air-saturated buffer solution (pH 6) at -0.222 V vs. Ag/AgCl. The NiO/NF(FTO) was prepared with 0.056 M  $\text{Ni}(\text{NO}_3)_2$  and 0.112 M  $\text{CO}(\text{NH}_2)_2$  precursor solution, and the SILAR cycle of CdSe was 6.

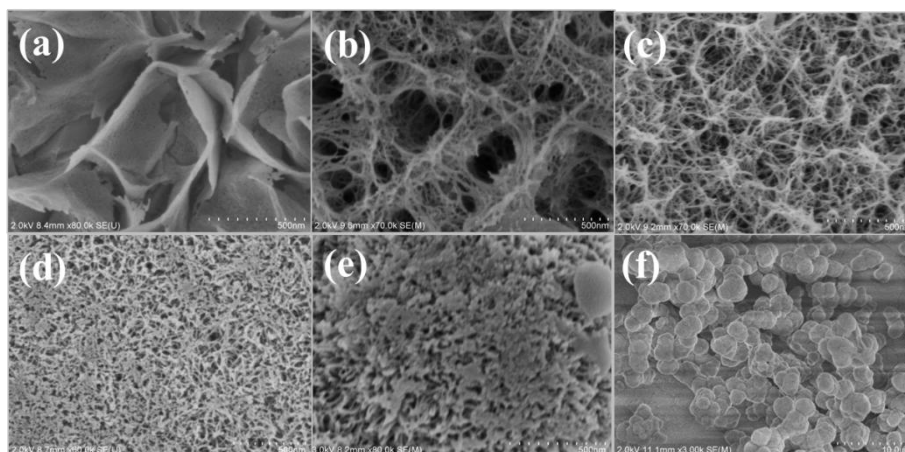

**Figure S2.** SEM images of (a) NiO-1/NF (b) NiO-2/NF(c) NiO-3/NF (d) NiO-4/NF (f) NiO-5/NF. (e) is the enlargement of (f). The NiO/NF prepared with 0.014 M  $\text{Ni}(\text{NO}_3)_2$  and 0.028 M  $\text{CO}(\text{NH}_2)_2$  precursor solution were signed as NiO-1/NF, and the electrode was signed as NiO-2/NF, NiO-3/NF, NiO-4/NF and NiO-5/NF when the concentrations of precursor solution is 2, 4, 6, 10 times of NiO-1/NF.)

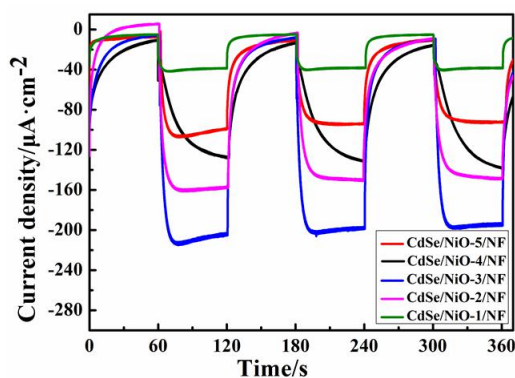

**Figure S3.** Photocurrent responses to on-off illumination of CdSe/NiO/NF in air-saturated buffer solution (pH 6) at -0.222 V vs. Ag/AgCl. (The NiO/NF prepared with 0.014 M  $\text{Ni}(\text{NO}_3)_2$  and 0.028 M  $\text{CO}(\text{NH}_2)_2$  precursor solution were signed as NiO-1/NF, and the electrode was signed as NiO-2/NF, NiO-3/NF, NiO-4/NF and NiO-5/NF when the concentrations of precursor solution is 2, 4, 6, 10 times of NiO-1/NF, and the SILAR cycle of CdSe was 6).

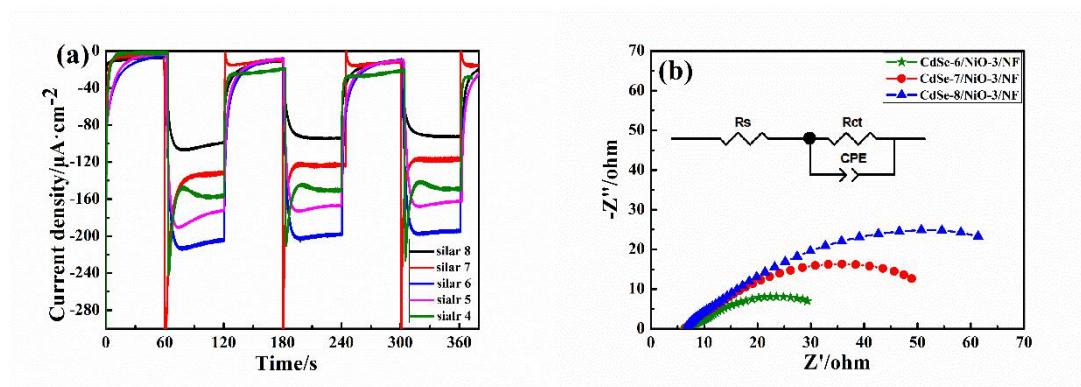

**Figure S4.** (a) Photocurrent responses to on-off illumination of CdSe/NiO/NF with different CdSe-SILAR cycle numbers (4-8) in air-saturated buffer solution (pH 6) at -0.222 V vs. Ag/AgCl. (b) Nyquist plots of CdSe/NiO/NF with different CdSe-SILAR cycle numbers (6-8) in nitrogen-saturated buffer solution (pH 6) with an equivalent circuit model in the inset. (The NiO/NF was prepared with 0.056 M Ni(NO<sub>3</sub>)<sub>2</sub> and 0.112 M CO(NH<sub>2</sub>)<sub>2</sub> precursor solution.)

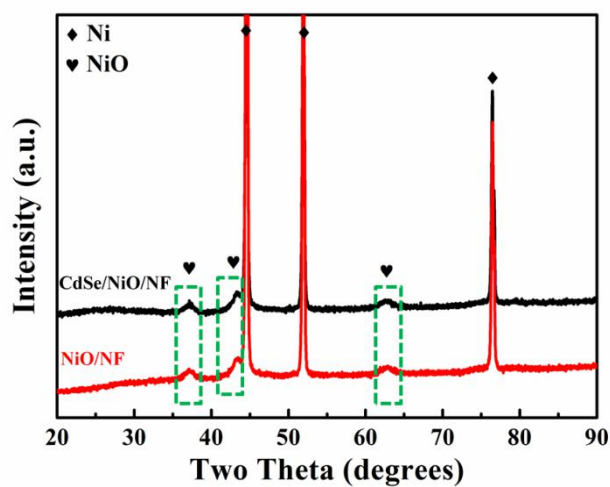

**Figure S5.** XRD patterns of NiO/NF and CdSe/NiO/NF photocathode. (The NiO/NF was prepared with 0.056 M Ni(NO<sub>3</sub>)<sub>2</sub> and 0.112 M CO(NH<sub>2</sub>)<sub>2</sub> precursor solution, and the SILAR cycle of CdSe was 6.)

**Table S1.** The results of EIS fitting into equivalent circuit model for CdSe/NiO/NF with different prepare conditions

| Sample        | Ni(NO <sub>3</sub> ) <sub>2</sub> ·6H <sub>2</sub> O<br>(M) | CO(NH) <sub>2</sub><br>(M) | SILAR cycles<br>of CdSe | R <sub>ct</sub><br>(Ω) | CPE<br>(μF) |
|---------------|-------------------------------------------------------------|----------------------------|-------------------------|------------------------|-------------|
| CdSe-6/NiO/NF | 0.056                                                       | 0.112                      | 6                       | 49.05                  | 10.64       |
| CdSe-7/NiO/NF | 0.056                                                       | 0.112                      | 7                       | 61.94                  | 6.11        |
| CdSe-8/NiO/NF | 0.056                                                       | 0.112                      | 8                       | 98.83                  | 2.99        |

**Table S2.** Comparison of different NiO-based photocathodes in a three-electrode PEC cell for the HER

| Photocathode                                      | conditions                                                        | Cocatalysist     | Photocurrent<br>density at an<br>applied potential<br>(V vs. NHE) | Ref.         |
|---------------------------------------------------|-------------------------------------------------------------------|------------------|-------------------------------------------------------------------|--------------|
| CdSe(SILAR)/NiO<br>NWs/NF                         | buffer solution<br>(pH=6); λ >400<br>nm                           | No               | 50 μA cm <sup>-2</sup> at<br>-0.014 V                             | Present work |
| MoS <sub>2</sub> /CdSe (SILAR)<br>/porous NiO/FTO | buffer solution<br>(pH=6); λ >400 nm                              | MoS <sub>2</sub> | 22 μA cm <sup>-2</sup> at<br>-0.014 V                             | 1            |
| CdSe(SILAR)/<br>NiO/FTO                           | 0.1 M LiClO <sub>4</sub> , 0.01<br>M PBS(pH= 6.8);<br>λ > 420 nm  | No               | <20 μA cm <sup>-2</sup> at 0<br>to 0.5 V                          | 2            |
| CdS/NiO/ FTO                                      | 0.05 M Na <sub>2</sub> SO <sub>4</sub>                            | Cobaloxime       | 25 μA cm <sup>-2</sup> at 0<br>V                                  | 3            |
| CdSe/NiO/FTO<br>linker-engineered<br>CdSe/NiO/FTO | 0.1 M Na <sub>2</sub> SO <sub>4</sub> ,<br>(pH=6.8); λ >400<br>nm | No               | 8 μA cm <sup>-2</sup><br>55 μA cm <sup>-2</sup> at<br>-0.1 V      | 4<br>4       |
| CdSe/NiO/FTO                                      | 0.1 M Na <sub>2</sub> SO <sub>4</sub> ,<br>(pH=6.8); λ >400<br>nm | CoP<br>Co        | 102 μA cm <sup>-2</sup><br>100 μA cm <sup>-2</sup><br>at 0 V      | 5<br>5       |

**Table S3.** The results of EIS fitting into equivalent circuit model for CdSe/NiO/NF with different prepare conditions

| Sample        | Ni(NO <sub>3</sub> ) <sub>2</sub> ·6H <sub>2</sub> O (M) | CO(NH) <sub>2</sub> (M) | SILAR cycles of CdSe | R <sub>ct</sub> (Ω) | CPE (μF) |
|---------------|----------------------------------------------------------|-------------------------|----------------------|---------------------|----------|
| CdSe/NiO-1/NF | 0.014                                                    | 0.028                   | 6                    | 202.2               | 0.57     |
| CdSe/NiO-2/NF | 0.028                                                    | 0.056                   | 6                    | 117.4               | 2.50     |
| CdSe/NiO-3/NF | 0.056                                                    | 0.112                   | 6                    | 49.05               | 10.64    |
| CdSe/NiO-4/NF | 0.084                                                    | 0.168                   | 6                    | 71.77               | 3.49     |
| CdSe/NiO-5/NF | 0.14                                                     | 0.28                    | 6                    | 161.4               | 0.72     |

### Notes and references

- 1 Y. M. Dong, Y. M. Chen, P. P. Jiang, G. L. Wang, X. M. Wu, R. X. Wu and C. Zhang, *Chem. Asian J.*, 2015, 10, 1660-1667.
- 2 M. A. Par, S. Y. Lee, J. H. Kim, S. H. Kang, H. Kim, C. J. Choi and K. S. Ahu, *Phys. Status Solidi A*, 2014, 211, 1868-1872.
- 3 Y. Na, B. Hu, Q.-L. Yang, J. Liu, L. Zhou, R.-Q. Fan and Y.-L. Yang, *Chin. Chem. Lett.*, 2015, 26, 141-144.
- 4 B. Liu, X.-B. Li, Y.-J. Gao, Z.-J. Li, Q.-Y. Meng, C.-H. Tung and L.-Z. Wu, *Energy Environ. Sci.*, 2015, 8, 1443-1449.
- 5 P. Meng, M. Wang, Y. Yang, S. Zhang and L. C. Sun, *J. Mater. Chem. A*, 2015, 3, 18852-18859.
